# Supplementary material for: Recombinantl-glutaminase obtained fromGeobacillus thermodenitrificansDSM-465: characterization andin silicoelucidation of conserved structural domains
Source: Royal Society of Chemistry journal article supplement (doi:10.1039/c8ra04740e), 2019-01-01
Supplement: c8ra04740e1.pdf [file c8ra04740e1.pdf]

## SUPPLEMENTARY DATA

**Table ST1.** The validation of protein 3-D model using various parameters

| Protein | C-score <sup>a</sup> | TM-score <sup>b</sup> | RMSD <sup>c</sup> | IDEN <sup>d</sup> | Cov <sup>e</sup> |
|---------|----------------------|-----------------------|-------------------|-------------------|------------------|
| GLS-GT  | 1.72                 | 0.96                  | 2.8Å              | 0.889             | 0.996            |

<sup>a</sup> Confidence (C) score for estimating the quality of predicted models (range -5 to 2].

<sup>b</sup> Template Modeling Score (TM-score) measure the structural similarity between two structures TM-score >0.5 indicates a model of correct topology and a TM-score <0.17 means a random similarity range 0 to 1).

<sup>c</sup> Heavy atoms Root-Mean-Square Deviation (RMSD) with respect to the experimental structure.

<sup>d</sup> IDEN is the percentage sequence identity in the structurally aligned region (range 0 to 1

<sup>e</sup> Cov represents the coverage of global structural alignment and is equal to the number of structurally aligned residues divided by length of the query protein cluster. (range 0 to 1)

**Table ST2.** Structural alignment report by TM-align, representing the rankwise PDB hits. 2<sup>nd</sup> rank bold highlighted is the report of comparison with GLS-K human. 5<sup>th</sup> rank 2pbyA is observed with highest sequence similarity (89%) in the structurally aligned region.

| Rank     | PDB Hit      | TM-score     | RMSD <sup>a</sup> | IDEN <sup>a</sup> | Cov          |
|----------|--------------|--------------|-------------------|-------------------|--------------|
| 1        | 1u60A        | 0.982        | 0.63              | 0.389             | 0.990        |
| <b>2</b> | <b>3czdA</b> | <b>0.948</b> | <b>1.18</b>       | <b>0.358</b>      | <b>0.977</b> |
| 3        | 3ihbA        | 0.943        | 1.57              | 0.397             | 0.987        |
| 4        | 5uqeA        | 0.941        | 1.67              | 0.361             | 0.987        |
| 5        | <b>2pbyA</b> | 0.900        | 1.51              | <b>0.890</b>      | 0.942        |
| 6        | 1mkiA        | 0.885        | 1.56              | 0.474             | 0.926        |
| 7        | 2wadC        | 0.699        | 3.72              | 0.123             | 0.851        |
| 8        | 2wafA        | 0.696        | 3.68              | 0.111             | 0.845        |
| 9        | 3vskA        | 0.694        | 3.75              | 0.094             | 0.845        |
| 10       | 3fwmA        | 0.681        | 3.18              | 0.119             | 0.796        |

- Ranking of proteins is based on TM-score of the structural alignment between the query structure and known structures in the PDB library.
- RMSD<sup>a</sup> is the RMSD between residues that are structurally aligned by TM-align.
- IDEN<sup>a</sup> is the percentage sequence identity in the structurally aligned region.
- Cov represents the coverage of the alignment by TM-align and is equal to the number of structurally aligned residues divided by length of the query protein

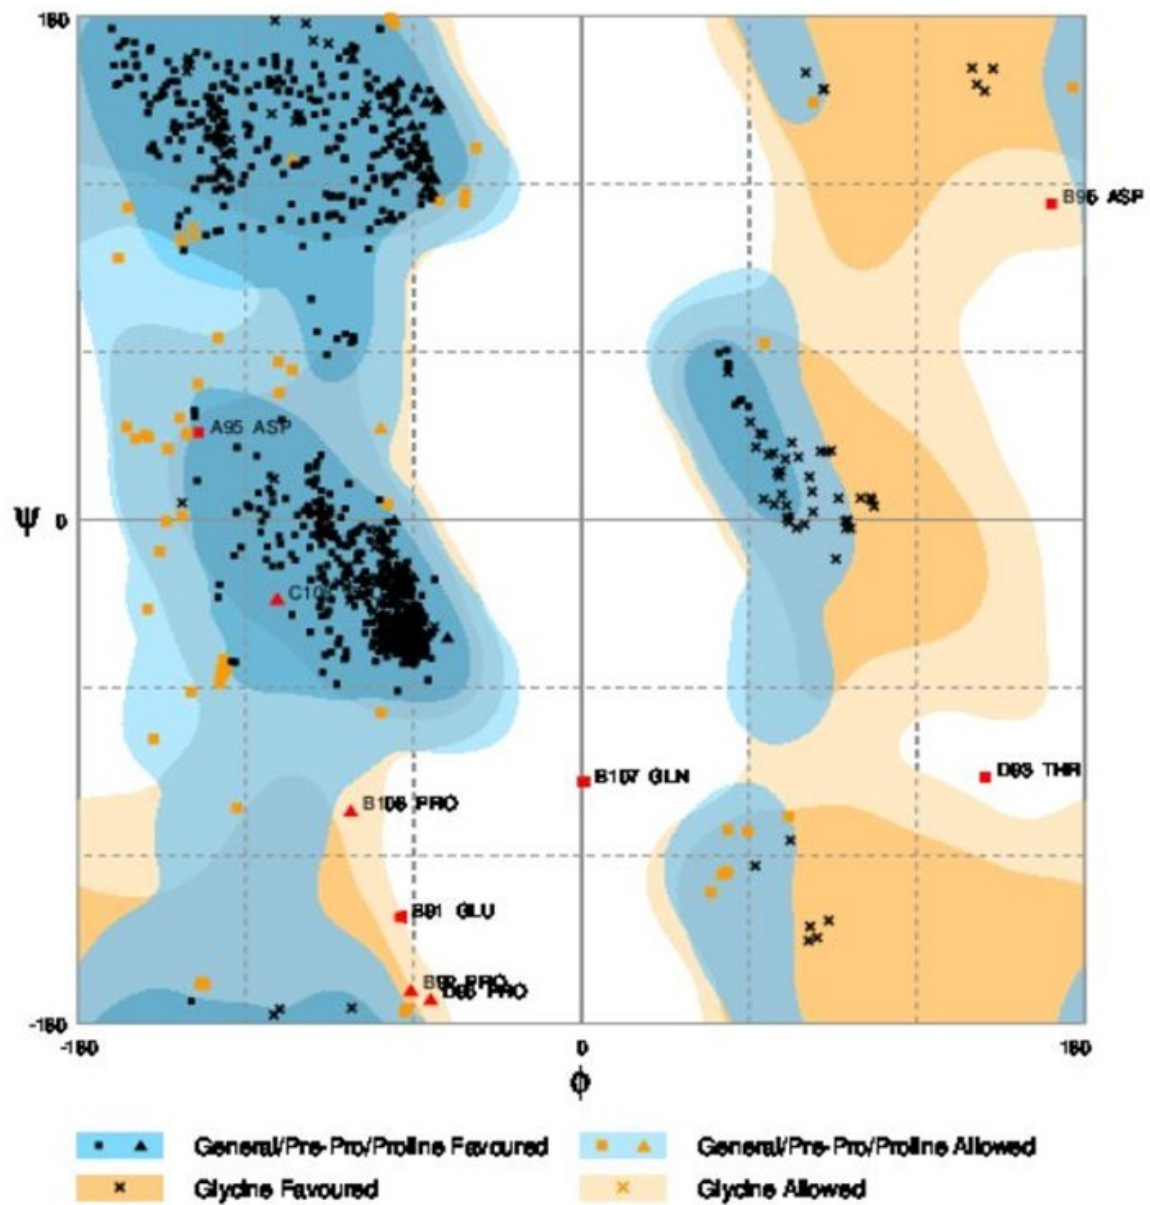

**Figure SF1.** The Ramachandran Plot generated by the RAMPAGE server depicting the quality of the built GLS-GT protein.

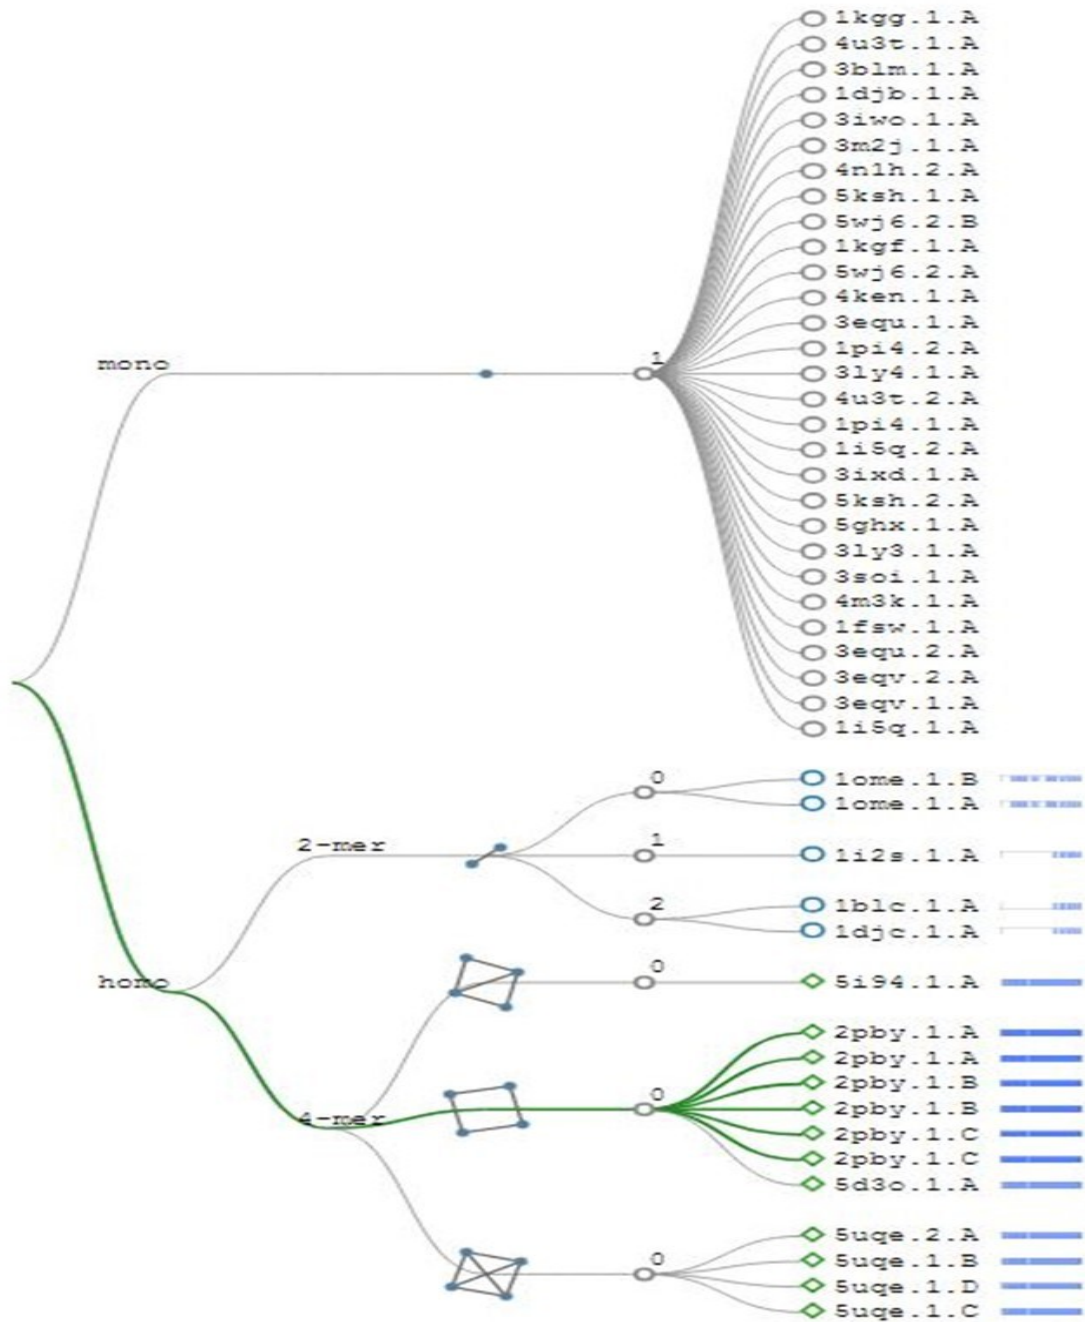

**Figure SF2.** Quaternary structure analysis report predicted by QSQE. Structural clustering tree of GLS-GT homologs with other known structures. Each leaf is a template labelled with the PDB code and a bar indicating sequence identity and coverage (darker shades of blue refer to higher sequence identity). The green thread indicates templates with predicted conserved quaternary structures.
